# Supplementary material
Source: ML conference proceedings conference paper supplement (https://proceedings.neurips.cc/paper_files/paper/2016/hash/97d0145823aeb8ed80617be62e08bdcc-Abstract.html)
Supplement: Supplementary file [file 97d0145823aeb8ed80617be62e08bdcc-Supplemental.zip]

## 1 Appendix

**Complete Generative Process of the CoT** The generative process for the CoT can be summarized as follows: First, we generate the prototypes and the subspace feature indicator vectors for each of the decision maker and item clusters as follows:

$$\begin{aligned} p_c &\sim \text{Uniform}(1, |J|) \forall c \\ p'_d &\sim \text{Uniform}(1, |I|) \forall d \\ \omega_{c,m} &\sim \text{Bernoulli}(\beta) \text{ where } \beta \sim \text{Beta}(\epsilon_\beta) \forall c, m \\ \omega'_{d,n} &\sim \text{Bernoulli}(\beta') \text{ where } \beta' \sim \text{Beta}(\epsilon'_\beta) \forall d, n \end{aligned}$$

We also sample the confusion matrices associated with every pair of (decision maker, item) clusters:

$$\begin{aligned} \Theta_{c,d,z}^{(t)}(e) &\sim \text{Dirichlet}(\wedge) \forall c, d, z, \text{ if } t = 1 \\ \Theta_{c,d,z}^{(t)}(e) &\sim \text{Dirichlet}(h_{\Theta_{c,d,z}^{(t)}(e), \Gamma}) \text{ where } h_{\Theta_{c,d,z}^{(t)}(e), \Gamma} = \Gamma \left( 1 + \pi \left[ \Theta_{c,d,z}^{(t)}(e) \right] \right) \forall c, d, z, \text{ if } t \geq 2 \end{aligned}$$

where  $z$  (row index) and  $e$  (column index) jointly index an element of the confusion matrix.

We then sample the cluster assignments and features of decision makers and items.

$$\begin{aligned} c_j &\sim \text{Multinomial}(\alpha) \text{ where } \alpha \sim \text{Dirichlet}(\epsilon_\alpha) \forall j \\ d_i &\sim \text{Multinomial}(\alpha') \text{ where } \alpha' \sim \text{Dirichlet}(\epsilon'_\alpha) \forall i \end{aligned}$$

Discrete features are sampled as:

$$\begin{aligned} a_m^{(j)} &\sim \text{Multinomial}(\phi_{c_j, m}) \text{ where } \phi_{c_j, m} \sim \text{Dirichlet}(g_{p_{c_j, m}, \omega_{c_j, m}, \lambda}) \text{ and } g \text{ defined in Eqn. 1 } \forall j, m \\ b_n^{(i)} &\sim \text{Multinomial}(\phi'_{d_i, n}) \text{ where } \phi'_{d_i, n} \sim \text{Dirichlet}(g_{p_{d_i, n}, \omega_{d_i, n}, \lambda}) \text{ and } g \text{ defined in Eqn. 1 } \forall i, n \end{aligned}$$

In the case of continuous features, we have the following generative steps:

$$\begin{aligned} a_m^{(j)} &\sim \text{Normal}(\phi_{c_j, m}, \sigma) \text{ where } \phi_{c_j, m} = p_{c, m} \text{ if } \omega_{c_j, m} = 1, \text{ Otherwise } \phi_{c_j, m} = 0 \forall j, m \\ b_n^{(i)} &\sim \text{Normal}(\phi'_{d_i, n}, \sigma) \text{ where } \phi_{d_i, n} = p_{d, n} \text{ if } \omega_{d_i, n} = 1 \text{ Otherwise } \phi_{d_i, n} = 0 \forall i, n \end{aligned}$$

The true labels associated with each of the items are sampled as:

$$z_i \sim \text{Multinomial}(\rho_{d_i}) \text{ where } \rho_{d_i} \sim \text{Dirichlet}(g'_{p'_{d_i}}) \text{ and } g' \text{ defined in Eqn. 2 } \forall i$$

Lastly, we sample the decisions made by decision makers on items along with the corresponding timestamps.

$$\begin{aligned} t_{j,i} &\sim \text{Uniform}(1, T) \forall j, i \\ r_{j,i} &\sim \text{Multinomial}(\Theta_{c_j, d_i, z_i}^{(t_{j,i})}) \forall j, i \end{aligned}$$
